# Supplementary material for: Study of VIPER and TATE in kinetoplastids and the evolution of tyrosine recombinase retrotransposons
Source: PubMed Central journal article supplement (PMC6681497; doi:10.1186/s13100-019-0175-2), 2019-08-05
Supplement: 13100_2019_175_MOESM5_ESM.pdf [file 13100_2019_175_MOESM5_ESM.pdf]

## Summary of main features of potentially encoding *TATE* copies

| <i>Scaffold/contig_position</i> | <b>ORF1<br/>Position<br/>Domain</b> | <b>ORF2<br/>Position<br/>Domain</b> | <b>ORF3<br/>Position<br/>Domain</b>   | <b>Repeats<br/>Basic structure<br/>size, identity</b>                         |
|---------------------------------|-------------------------------------|-------------------------------------|---------------------------------------|-------------------------------------------------------------------------------|
| <i>B. saltans</i>               |                                     |                                     |                                       |                                                                               |
| CYKH01000290.1_1157-6382        |                                     | 1-5226<br>DNA_BRE_C<br>RVT_1        |                                       | 5' →A1→A2<br>3' →B1→B2<br>A: 73 bp, 99%; B: 161 bp, 81%                       |
| CYKH01000240.1_371-4765         |                                     | 1-4395<br>DNA_BRE_C<br>RVT_1        |                                       | 5' – absent<br>3' – absent                                                    |
| <i>C. fasciculata</i>           |                                     |                                     |                                       |                                                                               |
| CfaC1_16_593910-598902          | 1-1225<br>N                         | 1269-3471<br>DNA_BRE_C              | 2960-4994<br>RT_like<br>DNA_pol3      | 5' – absent<br>3' – absent                                                    |
| <i>C. mellifica</i>             |                                     |                                     |                                       |                                                                               |
| MDUD01001032.1_377-5156         | 1-987<br><br>N                      | 1338-3360<br><br>DNA_BRE_C          | 3389-5156<br>RT_like<br>RNase         | 5' →A1<br>3' →A2<br>A: 357 bp, 100%<br>B: missing data                        |
| <i>S. culicis</i>               |                                     |                                     |                                       |                                                                               |
| AUXH01000761.1_1187-6266        | 1-840<br>N                          | 933-3987<br>Atrophin-1              | 3566-6266<br>RT_like                  | 5' →A1<br>3' →A2<br>A: 346 bp, 99%                                            |
| <i>Lep. pyrrocoris</i>          |                                     |                                     |                                       |                                                                               |
| LpyrH10_03_995010-1005122       | 1-1095<br>N                         | 674-3938<br>DNA_BRE_C               | 3151-5869<br>N                        | 5' – absent<br>3' – absent                                                    |
| LpyrH10_45_4163-13642           | 1-1200<br>N                         | 1623-3486<br>DNA_BRE_C              | 2732-5318<br>RT_like<br>dnaA          | 5' – absent<br>3' – absent                                                    |
| LpyrH10_10_418649-428385        | 1-1014<br>N                         | 969-3291<br>DNA_BRE_C               | 3317-5138<br>RT_like                  | 5' – absent<br>3' – absent                                                    |
| <i>L. braziliensis</i>          |                                     |                                     |                                       |                                                                               |
| LbrM.11_536345-553559           | 1-1218<br>N                         | 1311-4259<br>DNA_BRE_C              | Interrupted<br>ORF                    | 5' →A1<br>3' →B1→A2→B2<br>A: 381 bp, 96%<br>B: 294 bp, 99%                    |
| LbrM.30_1128659-1142875         | 1-1218<br>N                         | 1311-4245<br>DNA_BRE_C              | 3356-6218<br>RT_like<br>RNase         | 5' A1→B1→A2<br>3' →C→B2<br>A: 375 bp, 98%<br>B: 637 bp, 94%<br>C: 293 bp, 98% |
| LbrM.20.2_676198-690033         | 1-1218<br>N                         | 1311-4260<br>DNA_BRE_C<br>SPOR      | 3371-5837<br>RT_like<br>RNase<br>GcrA | 5' ←A1<br>3' ←A2<br>A: 71 bp, 100%                                            |
| LbrM.34_19966225-2010719        |                                     | 1-3642<br>DNA_BRE_C<br>SPOR         | 2754-5616<br>RT_like<br>RNase         | 5' →A1<br>3' →A2<br>A: 382 bp, 89%                                            |
| <i>T. theileri</i>              |                                     |                                     |                                       |                                                                               |
| NBCO01000006.1_199922-210051    | 1-1104<br>N                         | 1281-3762<br>DNA_BRE_C              | 3014-5981<br>RT_like                  | 5' →A1<br>3' →A2<br>A: 91 bp, 100%                                            |

Note: The position in the scaffold/contig refers to the position of the copy in the scaffold (first nucleotide of ORF 1 to the last nucleotide of ORF3). The position of the ORFs refers to their position within the copy, starting with the first position of the ORF1. Different repetitions are represented by different letters (A, B, C). The positions (5' or 3' end) of the repeat fragments are indicated and the fragments are represented in order. The size and identity of repeats are indicated. The presence of protein domains is indicated; N - no predicted domain;
