# Supplementary material for: Study of VIPER and TATE in kinetoplastids and the evolution of tyrosine recombinase retrotransposons
Source: PubMed Central journal article supplement (PMC6681497; doi:10.1186/s13100-019-0175-2), 2019-08-05
Supplement: 13100_2019_175_MOESM6_ESM.pdf [file 13100_2019_175_MOESM6_ESM.pdf]

## Evaluation of *VIPER* and *TATE* similar sequences outside Kinetoplastida.

Using blasp searches against the nr database of NCBI, we found some significant hits that suggested similarities between *VIPER* and *TATE* Reverse Transcriptase/RNase H (RT/RH) and Tyrosine Recombinase (YR) and some proteins from *Oceabacter sp.* (RT - PHR97723.1, PHR97648.1, PHR97720.1, PHR97545.1; YR - PHR97649.1, PHR97720.1, PHR97545.1, PHR97880.1, PHR94983.1) and *Candidatus Handelsmanbacteria* (RT - OGG55579.1; YR - OGG55578.1). The reciprocal blast searches show Kinetoplastid sequences from the second hit.

Although unexpected, this similarity was quite interesting, since it could represent the outcome of horizontal transfer. Thus, the sequences were included in the RT phylogeny. Nevertheless, the resultant tree evidenced a scattered distribution of these sequences inside the *VIPER-like* clade (Figure 1, below).

Trying to understand if the sequences are in fact part of *Oceabacter sp.* and *Candidatus Handelsmanbacteria* bacterium genomes, we retrieved their genome assemblies from NCBI:

- 1) *Oceanobacter sp.* (g-proteobacteria); GCA\_002733645.1; submitter: University of Southern California; date: 2017/10/26; metagenome-source: marine metagenome.
- 2) *Candidatus Handelsmanbacteria* bacterium; GCA\_001781055.1; submitter: Banfield Lab, University of California, Berkeley; date: 2016/10/19; metagenome-source: subsurface metagenome.

We observed in the tblastn results that the sequences similar to *VIPER* and *TATE* from these species are located mainly in the extremities of short contigs (Tables 1 and 2, below), so it is not possible to support that these sequences are actually part of these genomes. Moreover, additional searches performed with other species closely related to *Oceanobacter sp.* (*Oceanobacter kriegii* DSM 6294, GCA\_000422845.1; *Oleibacter marinus*, GCA\_900156675.1; *Thalassolituus oleivorans* MIL-1, GCA\_000355675.1) and with a different genome assembly of *Candidatus Handelsmanbacteria* bacterium (GCA\_003562965.1) did not result in significant hits. The sequences, however, are clearly DIRS retrotransposons since they present RT and YR domains.

Although we do not discard other explanations, taking all the considerations into account, we have not strong evidence that *Oceanobacter sp.* and *Candidatus Handelsmanbacteria* possess sequences similar to *VIPER* and *TATE*. It is possible that

the results represent contamination on genome sequence databases. The distribution of sequences in the phylogeny could suggest the sequences are from a kinetoplastida species that was not sequenced yet, probably a free-living species which may have been sampled in the metagenomes in question.

Another unexpected significant hit encompassed sequence WP\_106215579.1 that shows similarity to *VIPER* YR and is annotated as an integrase, from a bacterium, *Kineococcus rhizosphaerae*. We found homologous sequences of this gene in other two *Kineococcus* species, *Kineococcus xinjiangensis*, and *Kineococcus radiotolerans*.

Trying to understand these sequences, we retrieved their genome assemblies from NCBI:

- 1) *Kineococcus radiotolerans* SRS30216; GCA\_000017305.1; submitter: US DOE Joint Genome Institute; date: 2008/08/14.
- 2) *Kineococcus xinjiangensis*; GCA\_002934625.1; submitter: DOE Joint Genome Institute; date: 2018/02/21.
- 3) *Kineococcus rhizosphaerae*; GCA\_003002055.1; submitter: DOE Joint Genome Institute; date: 2018/03/15.

In this case, there is no strong evidence for sequence contamination, and we believe these sequences are, in fact, part of the genomes. Nevertheless, we did not find any evidence that these sequences are *DIRS* retrotransposons or DNA transposons. They are not repetitive, and they have no repeats like TIRs or TSDs. Trying to understand the relationship of these sequences with *VIPER-like* elements, we performed a BlastP search of WP\_106215579.1 protein, and we retrieve the first 250 sequences (e-value range from 0.0 - 1e-55). These sequences were aligned in Muscle[1], and a neighbor-joining tree was obtained on MEGA 7 [2]. Only one sequence from each well-supported clade was maintained, totaling 23 sequences that were used in the final YR tree showed in the main text.



Table 1: Summary of tblastn results of *VIPER* and *TATE* Reverse transcriptase (RT) and Tyrosine recombinase (YR) coding sequences in *Oceanobacter sp.* genome.

| Protein /Element | Contig/Scaffold                    | Size Contig/Scaffold | Identity | Align length | Start query | End query | Start subject | End subject | e-value   |
|------------------|------------------------------------|----------------------|----------|--------------|-------------|-----------|---------------|-------------|-----------|
| VIPER RT         | NVWL01000035.1_cds_PHR97723.1_314  | 1665                 | 25.85    | 468          | 483         | 909       | 1662          | 304         | 2,00E-24  |
| VIPER RT         | NVWL01000085.1_cds_PHR94983.1_1960 | 4032                 | 24.55    | 440          | 504         | 910       | 1452          | 196         | 6,00E-14  |
| VIPER RT         | NVWL01000036.1_cds_PHR97720.1_324  | 5646                 | 25.00    | 388          | 559         | 909       | 2639          | 1545        | 5,00E-11  |
| VIPER RT         | NVWL01000041.1_cds_PHR97545.1_543  | 4026                 | 28.57    | 217          | 503         | 710       | 1528          | 926         | 1,00E-09  |
| VIPER RT         | NVWL01000032.1_cds_PHR97879.1_3428 | 1578                 | 24.00    | 375          | 481         | 836       | 10714         | 9644        | 2,00E-09  |
| TATE RT          | NVWL01000037.1_cds_PHR97648.1_491  | 1671                 | 35.64    | 811          | 163         | 941       | 4754          | 2502        | 6,00E-111 |
| TATE RT          | NVWL01000036.1_cds_PHR97720.1_324  | 5646                 | 26.83    | 615          | 343         | 940       | 3065          | 1464        | 5,00E-28  |
| TATE RT          | NVWL01000032.1_cds_PHR97879.1_3428 | 1578                 | 28.64    | 426          | 339         | 752       | 10903         | 9734        | 3,00E-18  |
| TATE RT          | NVWL01000085.1_cds_PHR94983.1_1960 | 4032                 | 24.91    | 542          | 399         | 914       | 1548          | 190         | 2,00E-10  |
| TATE RT          | NVWL01000041.1_cds_PHR97545.1_543  | 4026                 | 26.62    | 417          | 391         | 770       | 1633          | 497         | 4,00E-10  |
| TATE YR          | NVWL01000037.1_cds_PHR97649.1_492  | 2517                 | 37.81    | 320          | 659         | 973       | 5320          | 4385        | 6,00E-47  |
| TATE YR          | NVWL01000036.1_cds_PHR97720.1_324  | 5646                 | 31.83    | 311          | 657         | 960       | 4166          | 3279        | 3,00E-28  |
| TATE YR          | NVWL01000032.1_cds_PHR97880.1_3429 | 1479                 | 30.05    | 203          | 764         | 964       | 11583         | 11011       | 8,00E-12  |
| TATE YR          | NVWL01000041.1_cds_PHR97545.1_543  | 4026                 | 28.62    | 283          | 683         | 960       | 3001          | 2192        | 1,00E-11  |
| TATE YR          | NVWL01000085.1_cds_PHR94983.1_1960 | 4032                 | 31.63    | 215          | 763         | 966       | 2583          | 1999        | 3,00E-11  |

Table 2: Summary of tblastn results of *VIPER* Reverse transcriptase (RT) and Tyrosine recombinase (YR) coding sequences in the *Candidatus Handelsmanbacteria bacterium* genome.

| Protein /Element | Contig/Scaffold | Size Contig/Scaffold | Identity | Align length | Start query | End query | Start subject | End subject | e-value |
|------------------|-----------------|----------------------|----------|--------------|-------------|-----------|---------------|-------------|---------|
| VIPER YR         | MFKF01000070.1  | 5402                 | 28.87    | 284          | 63          | 318       | 2426          | 3268        | 8e-018  |
| VIPER RT         | MFKF01000070.1  | 5402                 | 29.81    | 416          | 519         | 911       | 3952          | 5166        | 2e-042  |

## References

1. Edgar RC. MUSCLE: multiple sequence alignment with high accuracy and high throughput. *Nucleic Acids Res.* 2004;32:1792–7.
2. Kumar S, Stecher G, Tamura K. MEGA7: Molecular Evolutionary Genetics Analysis Version 7.0 for Bigger Datasets. *Mol Biol Evol.* 2016;33:1870–4.
