# Supplementary material for: Study of VIPER and TATE in kinetoplastids and the evolution of tyrosine recombinase retrotransposons
Source: PubMed Central journal article supplement (PMC6681497; doi:10.1186/s13100-019-0175-2), 2019-08-05
Supplement: 13100_2019_175_MOESM7_ESM.pdf [file 13100_2019_175_MOESM7_ESM.pdf]

List of genomes used for *in silico* searches.

| Source: TritrypDB                         |                     |                                                                                             |                          |
|-------------------------------------------|---------------------|---------------------------------------------------------------------------------------------|--------------------------|
| Organism                                  | Release/Version     | Summary                                                                                     | Contact/Data Source      |
| <i>B. ayalai</i> B08-376                  | Version: 2017-01-18 | <i>Blechnomonas ayalai</i> B08-376 Sequence and annotation                                  | Vyacheslav Yurchenko     |
| <i>C. fasciculata</i> strain Cf-C1        | Version: 2015-06-01 | <i>Crithidia fasciculata</i> Cf-C1 sequence and annotation                                  | Stephen M. Beverley      |
| <i>E. monterogei</i> strain LV88          | Version: 2015-01-16 | <i>Endotrypanum monterogei</i> LV88 Genome sequence and annotation                          | Stephen M. Beverley      |
| <i>L. aethiopica</i> L147                 | Version: 2014-12-16 | Genome sequence and annotation of <i>Leishmania aethiopica</i> L147                         | Stephen M. Beverley      |
| <i>L. amazonensis</i> MHOM/BR/71973/M2269 | Version: 2013-07-25 | Genome sequence of <i>Leishmania amazonensis</i> MHOM/BR/71973/M2269                        | Diana Bahia              |
| <i>L. arabica</i> strain LEM1108          | Version: 2014-12-16 | Genome sequence and annotation for <i>Leishmania arabica</i> strain LEM1108                 | Stephen M. Beverley      |
| <i>L. braziliensis</i> MHOM/BR/75/M2903   | Version: 2014-12-16 | <i>Leishmania braziliensis</i> M2903 Genome sequence and annotation                         | Stephen M. Beverley      |
| <i>L. braziliensis</i> MHOM/BR/75/M2904   | Version: 2016-05-28 | <i>Leishmania braziliensis</i> M2904 (MHOM/BR/75M2904) sequence and annotation from GeneDB. | Pathogen Sequencing Unit |
| <i>L. donovani</i> BPK282A1               | Version: 2016-05-28 | <i>Leishmania donovani</i> BPK282A1 sequence and annotation                                 | Matthew Berriman         |
| <i>L. enriettii</i> strain LEM3045        | Version: 2014-12-16 | <i>Leishmania enriettii</i> strain LEM3045 sequence and annotation                          | Stephen M. Beverley      |
| <i>L. gerbilli</i> strain LEM452          | Version: 2014-12-16 | Genome sequence and annotation for <i>Leishmania gerbilli</i> strain LEM452                 | Stephen M. Beverley      |
| <i>L. infantum</i> JPCM5                  | Version: 2015-12-07 | Genome sequence and annotation for <i>Leishmania infantum</i> JPCM5 (MCAN/ES/98/LLM-877)    | Pathogen Sequencing Unit |
| <i>L. major</i> strain Friedlin           | Version: 2016-05-28 | Genome sequence and annotation for <i>Leishmania major</i> Friedlin.                        | Pathogen Sequencing Unit |
| <i>L. mexicana</i> MHOM/GT/2001/U1103     | Version: 2016-05-28 | Genome sequence and annotation for <i>Leishmania mexicana</i> U1103                         | Pathogen Sequencing Unit |
| <i>L. panamensis</i> MHOM/COL/81/L13      | Version: 2014-12-16 | <i>Leishmania panamensis</i> L13 Genome sequence and annotation                             | Stephen M. Beverley      |
| <i>L. pyrrocoris</i> H10                  | Version: 2015-05-05 | <i>Leptomonas pyrrocoris</i> H10 sequence and annotation                                    | Julius Lukes             |
| <i>L. seymouri</i> ATCC 30220             | Version: 2015-05-06 | <i>Leptomonas seymouri</i> ATCC 30220 sequence and annotation                               | Vyacheslav Yurchenko     |
| <i>L. sp.</i> MAR LEM2494                 | Version: 2014-12-16 | <i>Leishmania sp.</i> MAR LEM2494 Genome sequence and annotation                            | Stephen M. Beverley      |
| <i>L. tarentolae</i> Parrot-TarII         | Version: 2011-06-22 | <i>Leishmania tarentolae</i> Parrot-TarII sequence and annotation                           | Jacques Corbeil          |
| <i>L. tropica</i> L590                    | Version: 2014-12-16 | Genome sequence and annotation of <i>Leishmania tropica</i> L590                            | Stephen M. Beverley      |
| <i>L. turanica</i> strain LEM423          | Version: 2014-12-16 | Genome sequence and annotation for <i>Leishmania turanica</i> strain LEM423                 | Stephen M. Beverley      |
| <i>T. brucei</i> brucei TREU927           | Version: 2016-05-19 | <i>Trypanosoma brucei</i> TREU927 sequence and annotation                                   | Pathogen Sequencing Unit |
| <i>T. brucei</i> gambiense DAL972         | Version: 2016-05-28 | Genome sequence and annotation for <i>Trypanosoma brucei</i> gambiense                      | Pathogen Sequencing Unit |
| <i>T. brucei</i> Lister strain 427        | Version: 2010-10-20 | Genome sequence and annotation for <i>Trypanosoma brucei</i> strain Lister 427              | Pathogen Sequencing Unit |
| <i>T. congolense</i> IL3000               | Version: 2016-06-06 | <i>Trypanosoma congolense</i> IL3000 sequence and annotation                                | Matthew Berriman         |

| <i>T. cruzi</i> CL Brener Esmeraldo-like     | Version: 2015-12-07               | Genome sequence and annotation for <i>Trypanosoma cruzi</i> CL Brener.                               | Pathogen Sequencing Unit                 |
|----------------------------------------------|-----------------------------------|------------------------------------------------------------------------------------------------------|------------------------------------------|
| <i>T. cruzi</i> CL Brener Non-Esmeraldo-like | Version: 2015-12-07               | Genome sequence and annotation for the non-Esmeraldo haplotype of <i>Trypanosoma cruzi</i> CL Brener | GeneDB                                   |
| <i>T. cruzi</i> marinkellei strain B7        | Version 1.0                       | <i>Trypanosoma cruzi</i> marinkellei sequence and annotation                                         | Oscar Frazen                             |
| <i>T. evansi</i> strain STIB 805             | Version: 2014-06-03               | <i>T. evansi</i> STIB 805 sequence and annotation                                                    | Achim Schnauffer                         |
| <i>T. grayi</i> ANR4                         | Version: 2014-06-17               | <i>Trypanosoma grayi</i> ANR4 sequence and annotation                                                | Mark Field                               |
| <i>T. rangeli</i> SC58                       | Version: 2013-10-30               | <i>Trypanosoma rangeli</i> SC58 sequence and annotation                                              | Edmundo Carlos Grisard                   |
| <i>T. vivax</i> Y486                         | Version: 2016-06-06               | Genome sequence and annotation for <i>Trypanosoma vivax</i> Y486                                     | Pathogen Sequencing Unit                 |
| <b>Source: NCBI</b>                          |                                   |                                                                                                      |                                          |
| <b>Organism</b>                              | <b>GenBank assembly accession</b> | <b>Genome coverage/Assembly level</b>                                                                | <b>Submitter</b>                         |
| <i>Angomonas deanei</i> ATCC PRA-265         | GCA_001659865.1                   | 344x/Scaffold                                                                                        | Heinrich Heine University Duesseldorf    |
| <i>Bodo saltans</i> Lake Konstanz            | GCA_001460835.1                   | 170x/ Contig                                                                                         | Wellcome Trust Sanger Institute          |
| <i>Crithidia bombi</i> IL132                 | GCA_002216585.1                   | 100x/ Scaffold                                                                                       | University of Massachusetts              |
| <i>Crithidia mellificae</i> ATCC 30862       | GCA_002216565.1                   | 100x/ Scaffold                                                                                       | University of Massachusetts              |
| <i>Leishmania peruviana</i> PAB-4377_V1      | GCA_001403675.1                   | 59x/Chromosome                                                                                       | UFMG                                     |
| <i>Lotmaria passim</i> ATCC PRA-422          | GCA_002216525.1                   | 100x/ Scaffold                                                                                       | University of Massachusetts              |
| <i>Phytomonas francai</i>                    | GCA_001766655.1                   | 200x/ Scaffold                                                                                       | University of Oxford                     |
| <i>Phytomonas</i> sp. isolate EM1            | GCA_000582765.1                   | 20x/ Scaffold                                                                                        | Genoscope CEA                            |
| <i>Phytomonas</i> sp. isolate Hart1          | GCA_000982615.1                   | 20x/ Scaffold                                                                                        | Genoscope CEA                            |
| <i>Strigomonas culicis</i> TCC012E           | GCA_000482145.1                   | 23x/ Contig                                                                                          | Virginia Commonwealth University         |
| <i>Trypanosoma cruzi</i> Dm28c PB1           | GCA_002219105.2                   | 150x/ Contig                                                                                         | Instituto Carlos Chagas - ICC/Fiocruz-PR |
| <i>Trypanosoma equiperdum</i> OVI V2         | GCA_001457755.2                   | 104x/ Scaffold                                                                                       | ANSES                                    |
| <i>Trypanosoma theileri</i> Edinburgh        | GCA_002087225.1                   | 100x/ Scaffold                                                                                       | University of Edinburgh                  |
