# Supplementary material for: Study of VIPER and TATE in kinetoplastids and the evolution of tyrosine recombinase retrotransposons
Source: PubMed Central journal article supplement (PMC6681497; doi:10.1186/s13100-019-0175-2), 2019-08-05
Supplement: 13100_2019_175_MOESM14_ESM.pdf [file 13100_2019_175_MOESM14_ESM.pdf]

List of sequences used for RT and RH phylogenies.

| Name             | Organism                                    | ID NCBI/Uniprot | Classification |
|------------------|---------------------------------------------|-----------------|----------------|
| HBV              | <i>Hepatitis B virus</i>                    | YP_009173866.1  | Hepadnavirus   |
| WHV              | <i>Woodchuck hepatitis virus 59</i>         | P12899          | Hepadnavirus   |
| DomCatH          | <i>Domestic cat hepadnavirus</i>            | NC_040719       | Hepadnavirus   |
| Bluegill_HBV     | <i>Bluegill hepatitis B virus</i>           | NC_030445       | Hepadnavirus   |
| ASHV             | <i>Arctic ground squirrel hepatitis B</i>   | U29144          | Hepadnavirus   |
| RBVHB            | <i>Roundleaf bat hepatitis B virus</i>      | KC790376        | Hepadnavirus   |
| Bat_hepadnavirus | <i>Bat hepadnavirus</i>                     | MG600411        | Hepadnavirus   |
| SHBV             | <i>Shrew hepatitis B virus</i>              | MH484442        | Hepadnavirus   |
| DHBV             | <i>Duck hepatitis B virus</i>               | P30028.1        | Hepadnavirus   |
| LvNgaro1         | <i>Lytechinus variegatus</i>                | BK001253        | Ngaro-like     |
| HchiNgaro        | <i>Hynobius chinensis</i>                   | GAQK01079872    | Ngaro-like     |
| XtNgaro2         | <i>Xenopus tropicalis</i>                   | AC175582        | Ngaro-like     |
| DIRS-7_CGi       | <i>Crassostrea gigas</i>                    | Repbase         | Ngaro-like     |
| DIRS-32_ACar     | <i>Anolis carolinensis</i>                  | Repbase         | Ngaro-like     |
| DIRS-6_CGi       | <i>Crassostrea gigas</i>                    | Repbase         | Ngaro-like     |
| SpNgaro3         | <i>Strongylocentrotus purpuratus</i>        | AAGJ04006304    | Ngaro-like     |
| DIRS-22_NV       | <i>Nematostella vectensis</i>               | Repbase         | Ngaro-like     |
| LvNgaro2         | <i>Lytechinus variegatus</i>                | AGCV01398517    | Ngaro-like     |
| Ngaro1_Dr        | <i>Danio rerio</i>                          | Repbase         | Ngaro-like     |
| MuLV             | <i>Murine leukemia virus</i>                | P03356.3        | Retrovirus     |
| HTLV1            | <i>Human T-cell lymphotropic virus</i>      | P03362.3        | Retrovirus     |
| MMTV             | <i>Mouse mammary tumor virus</i>            | P03365.3        | Retrovirus     |
| MPMV             | <i>Mason-Pfizer monkey virus</i>            | P07572.1        | Retrovirus     |
| SIV              | <i>Simian immunodeficiency virus</i>        | P22382.2        | Retrovirus     |
| HIV2             | <i>Human immunodeficiency virus type</i>    | Q74120.3        | Retrovirus     |
| CAEV             | <i>Caprine arthritis encephalitis virus</i> | P33459.1        | Retrovirus     |
| BFV              | <i>Bovine foamy virus</i>                   | NC_001831       | Retrovirus     |
| SERV             | <i>Simian endogenous retrovirus</i>         | U85505          | Retrovirus     |
| SRV1             | <i>Simian retrovirus 1</i>                  | P04025          | Retrovirus     |
| RSV              | <i>Rous sarcoma virus</i>                   | BAD98246        | Retrovirus     |
| FMV              | <i>Figwort mosaic virus</i>                 | NP_619548.1     | Caulimovirus   |
| BSOLV            | <i>Banana streak OL virus</i>               | AJ002234        | Caulimovirus   |
| BsCVBV           | <i>Bougainvillea spectabilis chlorotic</i>  | EU034539        | Caulimovirus   |
| CSSV             | <i>Cacao swollen shoot virus</i>            | L14546          | Caulimovirus   |
| BSVAV            | <i>Banana streak virus</i>                  | AY750155        | Caulimovirus   |
| CSVMV            | <i>Cassava vein mosaic virus</i>            | U59751          | Caulimovirus   |
| LLDAV            | <i>Lamium leaf distortion associated</i>    | NC_010737       | Caulimovirus   |
| PVCV             | <i>Petunia vein clearing virus</i>          | NC_001839       | Caulimovirus   |
| RTBV             | <i>Rice tungro bacilliform virus</i>        | X57924          | Caulimovirus   |
| CerV             | <i>Carnation etched ring virus</i>          | P05400.1        | Caulimovirus   |
| CaMV             | <i>Cauliflower mosaic virus</i>             | Q02964.1        | Caulimovirus   |
| 17.6             | <i>Drosophila melanogaster</i>              | P04323.1        | Gypsy          |
| 297              | <i>Drosophila melanogaster</i>              | P20825.1        | Gypsy          |
| Gypsy            | <i>Drosophila melanogaster</i>              | P10401.1        | Gypsy          |
| Ty3              | <i>Saccharomyces cerevisiae</i>             | CAA97115.1      | Gypsy          |
| MAGGY            | <i>Pyricularia grisea</i>                   | L35053.1        | Gypsy          |

|             |                                      |              |                 |
|-------------|--------------------------------------|--------------|-----------------|
| Peabody     | <i>Pisum sativum</i>                 | AF083074     | <i>Gypsy</i>    |
| 412         | <i>Drosophila melanogaster</i>       | X04132       | <i>Gypsy</i>    |
| Micropia    | <i>Drosophila melanogaster</i>       | X14037       | <i>Gypsy</i>    |
| Cer1        | <i>Caenorhabditis elegans</i>        | U15406       | <i>Gypsy</i>    |
| Mag         | <i>Bombyx mori</i>                   | X17219       | <i>Gypsy</i>    |
| Tor2        | <i>Oikopleura dioica</i>             | AY634223     | <i>Gypsy</i>    |
| Cinful1     | <i>Zea mays</i>                      | AF049110.1   | <i>Gypsy</i>    |
| Copia       | <i>Drosophila melanogaster</i>       | P04146.3     | <i>Copia</i>    |
| 1731        | <i>Drosophila melanogaster</i>       | S00954       | <i>Copia</i>    |
| Ty1         | <i>Saccharomyces cerevisiae</i>      | P47100.3     | <i>Copia</i>    |
| CoDi5.5     | <i>Thalassiosira pseudonana</i>      | EU432490     | <i>Copia</i>    |
| GalEa1      | <i>Eumunida annulosa</i>             | EU097705     | <i>Copia</i>    |
| Koala       | <i>Oryza australiensis</i>           | DQ365823     | <i>Copia</i>    |
| Tnt-1       | <i>Nicotiana tabacum</i>             | X13777       | <i>Copia</i>    |
| Yokozuna    | <i>Bombyx mori</i>                   | AB014676     | <i>Copia</i>    |
| pCretro6    | <i>Phanerochaete chrysosporium</i>   | DQ097838     | <i>Copia</i>    |
| CoDi4.5     | <i>Thalassiosira pseudonana</i>      | EU432485     | <i>Copia</i>    |
| CoDi7.1     | <i>Phaeodactylum tricornutum</i>     | EU432499     | <i>Copia</i>    |
| Kangaroo    | <i>Volvox carteri f. nagariensis</i> | AAM94957.1   | <i>PAT-like</i> |
| PAT         | <i>Panagrellus redivivus</i>         | Q26106       | <i>PAT-like</i> |
| DIRS-1_CCri | <i>Chondrus crispus</i>              | Rebase       | <i>PAT-like</i> |
| DIRS-1_CGi  | <i>Crassostrea gigas</i>             | Rebase       | <i>PAT-like</i> |
| SkowPAT     | <i>Saccoglossus kowalevskii</i>      | ACQM01123180 | <i>PAT-like</i> |
| DIRS-1_NGr  | <i>Naegleria gruberi</i>             | Rebase       | <i>PAT-like</i> |
| DIRS-1_PH   | <i>Parhyale hawaiiensis</i>          | Rebase       | <i>DIRS</i>     |
| EvenDIRS    | <i>Echinogammarus veneris</i>        | GARO01000003 | <i>DIRS</i>     |
| DIRS-1_ACar | <i>Anolis carolinensis</i>           | Rebase       | <i>DIRS</i>     |
| DIRS-6_CPB  | <i>Chrysemys picta bellii</i>        | Rebase       | <i>DIRS</i>     |
| DIRS-8_PSi  | <i>Pelodiscus sinensis</i>           | Rebase       | <i>DIRS</i>     |
| DIRS-12_DR  | <i>Danio rerio</i>                   | Rebase       | <i>DIRS</i>     |
| DIRS-3_XT   | <i>Xenopus tropicalis</i>            | Rebase       | <i>DIRS</i>     |
| DIRS-7_XL   | <i>Xenopus laevis</i>                | Rebase       | <i>DIRS</i>     |
| DIRS-1_LG   | <i>Lottia gigantea</i>               | Rebase       | <i>DIRS</i>     |
| DIRS-1_CTe  | <i>Capitella teleta</i>              | Rebase       | <i>DIRS</i>     |
| DIRS-1_BF   | <i>Branchiostoma floridae</i>        | Rebase       | <i>DIRS</i>     |
| DIRS-1_NV   | <i>Nematostella vectensis</i>        | Rebase       | <i>DIRS</i>     |
| DIRS-1_NVi  | <i>Nasonia vitripennis</i>           | Rebase       | <i>DIRS</i>     |
| DIRS-1_SIn  | <i>Solenopsis invicta</i>            | Rebase       | <i>DIRS</i>     |
| DIRS-2_DPu  | <i>Daphnia pulex</i>                 | Rebase       | <i>DIRS</i>     |
| DIRS-8_NV   | <i>Nematostella vectensis</i>        | Rebase       | <i>DIRS</i>     |
| DIRS-8_Lch  | <i>Latimeria chalumnae</i>           | Rebase       | <i>DIRS</i>     |
| DIRS1       | <i>Dictyostelium discoideum</i>      | M11339       | <i>DIRS</i>     |
| DIRS_Nvi    | <i>Nasonia vitripennis</i>           | Rebase       | <i>DIRS</i>     |
| PAO         | <i>Bombyx mori</i>                   | Rebase       | <i>Bel-Pao</i>  |
| BEL         | <i>Drosophila melanogaster</i>       | U23420.1     | <i>Bel-Pao</i>  |
| BEL-26_DR   | <i>Danio rerio</i>                   | Rebase       | <i>Bel-Pao</i>  |
| Ninja       | <i>Drosophila simulans</i>           | D83207.1     | <i>Bel-Pao</i>  |
| Tammy       | <i>Antheraea mylitta</i>             | AF530470.1   | <i>Bel-Pao</i>  |
| Max         | <i>Drosophila melanogaster</i>       | AJ487856.1   | <i>Bel-Pao</i>  |

|                      |                                  |             |                    |
|----------------------|----------------------------------|-------------|--------------------|
| Cer7                 | <i>Caenorhabditis elegans</i>    | AF014939.1  | <i>Bel-Pao</i>     |
| Moose                | <i>Anopheles gambiae</i>         | AF060859.1  | <i>Bel-Pao</i>     |
| Roo                  | <i>Drosophila melanogaster</i>   | AY180917.1  | <i>Bel-Pao</i>     |
| Suzu                 | <i>Takifugu rubripes</i>         | AF537216.1  | <i>Bel-Pao</i>     |
| BEL-4_LSal           | <i>Lepeophtheirus salmonis</i>   | Repbase     | <i>Bel-Pao</i>     |
| Ingi                 | <i>Trypanosoma brucei</i>        | M16068      | <i>LINE</i>        |
| Jockey               | <i>Drosophila melanogaster</i>   | P21328      | <i>LINE</i>        |
| Lian                 | <i>Aedes aegypti</i>             | Repbase     | <i>LINE</i>        |
| Bilbo                | <i>Drosophila subobscura</i>     | Repbase     | <i>LINE</i>        |
| TRAS1                | <i>Bombyx mori</i>               | Repbase     | <i>LINE</i>        |
| SLACS                | <i>Trypanosoma brucei</i>        | CAA34931.1  | <i>LINE</i>        |
| <i>S.pombe</i>       | <i>Schizosaccharomyces pombe</i> | NP_596126.1 | <i>RH outgroup</i> |
| <i>G.gallus</i>      | <i>Gallus gallus</i>             | NP_990329.1 | <i>RH outgroup</i> |
| <i>C.fasciculata</i> | <i>Crithidia fasciculata</i>     | Q07762.1    | <i>RH outgroup</i> |
